# Supplementary material
Source: PubMed Central journal article supplement (PMC4555480)
Supplement: Supp_Fig1.pdf [file Supp_Fig1.pdf]

## Supplemental results

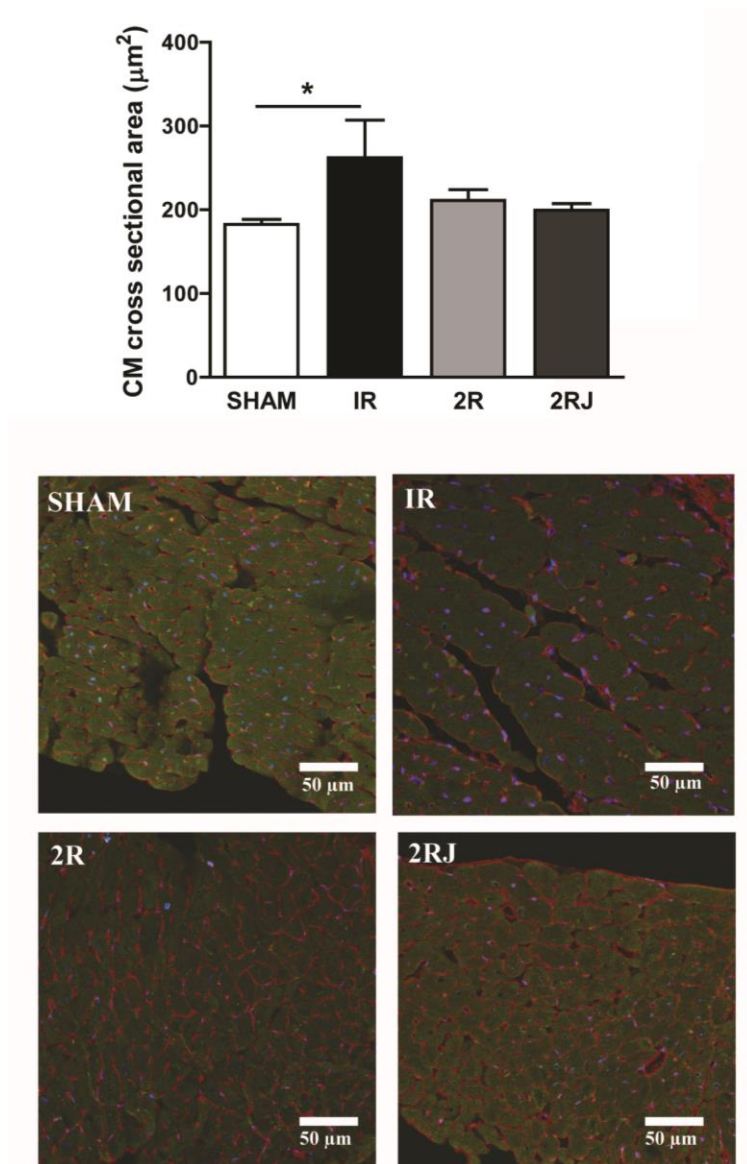

Figure 1: Delivery of 2RJ hydrogel does not alter cardiomyocyte area. (A) Quantification of cardiomyocyte cell area in rat hearts on day 21 shows no change in cell area (μm<sup>2</sup>) in infarcted rats treated with 2RJ hydrogel. \* p<0.05, n= 3-6 per group. (B) Representative images of heart sections stained with Wheat Germ Agglutinin (Red), and DAPI (blue). Scale bar = 50 μm. 2R = 2% RAD hydrogel, 2RJ = 2% RAD hydrogel with Jagged peptide.
