# Supplementary material
Source: PubMed Central journal article supplement (PMC4555480)
Supplement: Supp_Fig2.pdf [file Supp_Fig2.pdf]

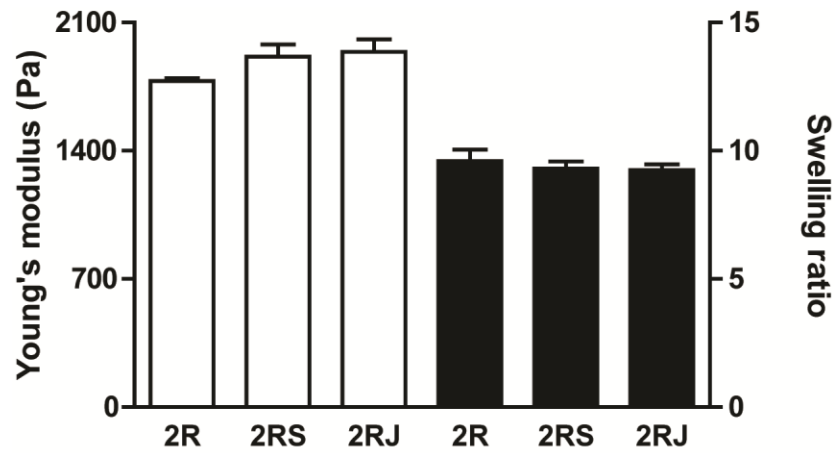

Figure 2: Incorporation of Jagged or scrambled sequences does not alter stiffness or swelling ratio of hydrogel. White bars and left axis show stiffness (Pa) as measured by atomic force microscopy. There were no significant changes between groups. Similarly, black bars and right axis show no changes in swelling ratio. 2R = 2% RAD hydrogel, 2RJ = 2% RAD hydrogel with Jagged peptide.
